# Supplementary material for: Genetic engineering a large animal model of human hypophosphatasia in sheep
Source: PubMed Central journal article supplement (PMC6240114; doi:10.1038/s41598-018-35079-y), 2018-11-16
Supplement: 41598_2018_35079_MOESM1_ESM.pdf [file 41598_2018_35079_MOESM1_ESM.pdf]

## **SUPPLEMENTARY INFORMATION FOR:**

### **Genetic engineering a large animal model of human hypophosphatasia in sheep**

**Authors:** Diarra K. Williams<sup>1#</sup>, Carlos Pinzón<sup>1#</sup>, Shannon Huggins<sup>1</sup>, Jane H. Pryor<sup>1</sup>, Alyssa Falck<sup>2</sup>, Forrest Herman<sup>1</sup>, James Oldeschulte<sup>1</sup>, Michael B. Chavez<sup>3</sup>, Brian L. Foster<sup>3</sup>, Sarah H White<sup>4</sup>, Mark E. Westhusin<sup>1</sup>, Larry J. Suva<sup>1</sup>, Charles R. Long<sup>1</sup>, and Dana Gaddy<sup>\*3</sup>

**Affiliations:**

<sup>1</sup> Department of Veterinary Physiology and Pharmacology, College of Veterinary Medicine and Biomedical Sciences, Texas A&M University, College Station, TX 77843

<sup>2</sup> Department of Veterinary Integrative Biosciences, College of Veterinary Medicine and Biomedical Sciences, Texas A&M University, College Station, TX 77843

<sup>3</sup> Division of Biosciences, College of Dentistry, The Ohio State University, Columbus, OH, USA.

<sup>4</sup> Department of Animal Science, College of Agriculture and Life Sciences, Texas A&M University, College Station, TX 77843

\* Corresponding author. Dr. Dana Gaddy, Department of Veterinary Integrative Biosciences, College of Veterinary Medicine and Biomedical Sciences, Texas A&M University, College Station, TX 77843; 979-862-9134; dgaddy@cvm.tamu.edu

# Authors contributed equally to this work.

## Supplementary Information

|              |     |                                                                                    |     |
|--------------|-----|------------------------------------------------------------------------------------|-----|
| <b>Human</b> | 1   | MISPFVLVLAIGTCLTNSLVPEKEKDPKYWRDQAQETLKYALELQKLNNTNVAKNVIMFLGDGMGVSTVTAARILKGQLHHN | 80  |
| <b>Sheep</b> | 1   | MISPFVLVLAIGTCLASSLVPEKEKDPKYWRDQAQQLKNAQLRLQTLNNTNVAKNVIMFLGDGMGVSTVTAARILKGQLHHN | 80  |
| <b>Mouse</b> | 1   | MISPFVLVLAIGTCLTNSFVPEKERDPSYWRQQAQETLKNALKLQKLNNTNVAKNVIMFLGDGMGVSTVTAARILKGQLHHN | 80  |
| <b>Human</b> | 81  | PGEETRLEMDKFPFVALSKTYNTNAQVPDSAGTATAYLCGVKANEGTVGVSAATERSRCNTTQGNEVTSILRWAKDAGKS   | 160 |
| <b>Sheep</b> | 81  | PGEETKLEMDKFPYVALSKTYNTNAQVPDSAGTATAYLCGVKANEGTVGVSAATQRSQCNTTQGNEVTSILRWAKDAGKS   | 160 |
| <b>Mouse</b> | 81  | TGEETRLEMDKFPFVALSKTYNTNAQVPDSAGTATAYLCGVKANEGTVGVSAATERTRCNTTQGNEVTSILRWAKDAGKS   | 160 |
| <b>Human</b> | 161 | VGIVTTTRVNHATPSAAYAHSADRWDWYSDNEMPEALSQGCKDIAYQLMHNIRDIDVIMGGGRKYMYPKNKTDVEYESDE   | 240 |
| <b>Sheep</b> | 161 | VGIVTTTRVNHATPSASYAHSADRWDWYSDNEMPEALSQGCKDIAYQLMHNVKDIEVIMGGGRKYMFPKNRDTVEYELDE   | 240 |
| <b>Mouse</b> | 161 | VGIVTTTRVNHATPSAAYAHSADRWDWYSDNEMPEALSQGCKDIAYQLMHNIKDIDVIMGGGRKYMYPKNRDTVEYELDE   | 240 |
| <b>Human</b> | 241 | KARGTRLDGLDLVDITWKSFKPRHKHSHFIWNRTPELLTLDPHNVLDYLLGLFEPGDMQYELNRNNTDPSLSEMVVAIQIL  | 320 |
| <b>Sheep</b> | 241 | KARGTRLDGLNLVDIWKSFKPKHKHSHYVWNRTDLLALDPHTVDYLLGLFEPGDMQYELNRNNTDPSLSEMVEMAIRIL    | 320 |
| <b>Mouse</b> | 241 | KARGTRLDGLDLISIWKSFKPRHKHSHYVWNRTPELLALDPSRVDYLLGLFEPGDMQYELNRNNTDPSLSEMVVALRIL    | 320 |
| <b>Human</b> | 321 | RKNPKGFFLLVEGGRIDHGHHEGKAKQALHEAVEMDRAIQAGSLTSSDITLVVTTADHSHVFTFGGYTPRGNSIFGLAP    | 400 |
| <b>Sheep</b> | 321 | NKNPKGFFLLVEGGRIDHGHHEGKAKQALHEAVEMDQAIQAGAMTSVEDITLVVTTADHSHVFTFGGYTPRGNSIFGLAP   | 400 |
| <b>Mouse</b> | 321 | TKNLKGFFLLVEGGRIDHGHHEGKAKQALHEAVEMDQAIQKAGAMTSQKDTLVVTTADHSHVFTFGGYTPRGNSIFGLAP   | 400 |
|              |     | <b>Ile&gt;Met</b>                                                                  |     |
| <b>Human</b> | 401 | MLSDTDKKPFTAILYGNGPGYKVVGERENVSMDVYAHNNYQAQSAVPLRHETHGGEDVAVFSKGPMAHLLHGVHEQNYV    | 480 |
| <b>Sheep</b> | 401 | MVSDTDKKPFTAILYGNGPGYKVVGERENVSMDVYAHNNYQA-----VAVFAKGPMAHLLHGVHEQNYI              | 465 |
| <b>Mouse</b> | 401 | MVSDTDKKPFTAILYGNGPGYKVVGERENVSMDVYAHNNYQAQSAVPLRHETHGGEDVAVFAKGPMAHLLHGVHEQNYI    | 480 |
| <b>Human</b> | 481 | PHVMAYAACIGANLGHCAPASSAGSLAA-----GPLLLALALYPLSVLF-----                             | 524 |
| <b>Sheep</b> | 466 | PHVMAYAACIGANRDHCA---SASSPLPargprkpsachppgSPLESSTAARSVAGLQpppppaapfwptg            | 534 |
| <b>Mouse</b> | 481 | PHVMAYASCIGANLDHCAWAGSGSAPSP-----GALLLPLAVLSLRTLF-----                             | 524 |

**Supplemental Fig. 1. Amino Acid sequence alignment of human, sheep and mouse TNSALP protein sequences. Conserved Exon 10 Ile342 > Met for targeted mutation is shown.**

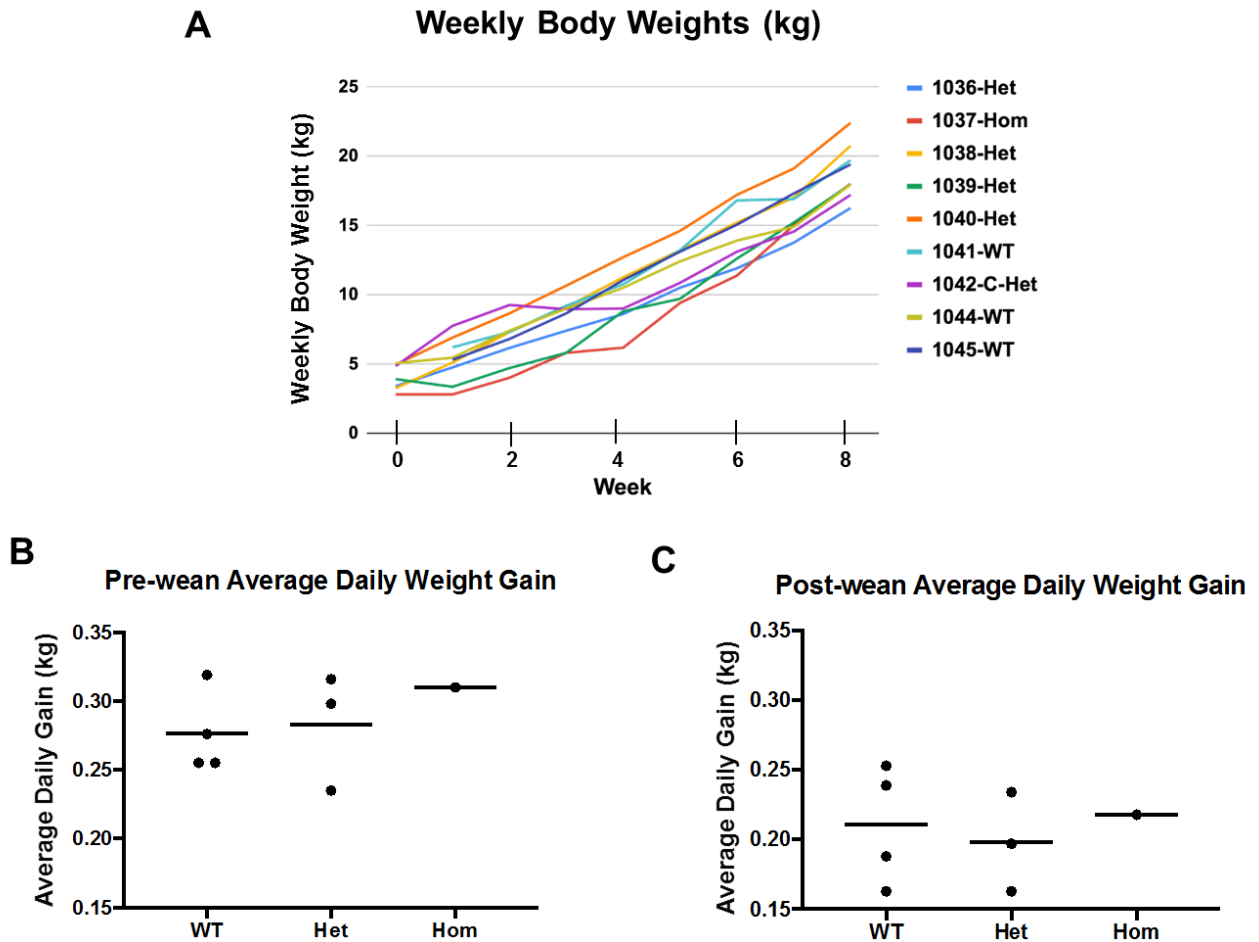

**Supplemental Fig. 2 Longitudinal weight gain was similar across all genotypes.** Weights were measured at birth and weekly during life. (A) Individual preweaning weekly body weights are plotted for all 9 animals, showing similar growth rates over the first 8 weeks of life. Average daily weight gain for each animal is plotted by genotype during (B) pre-weaning and (C) post-weaning to 6 months of age. No significant difference in weight gain by genotype is observed.

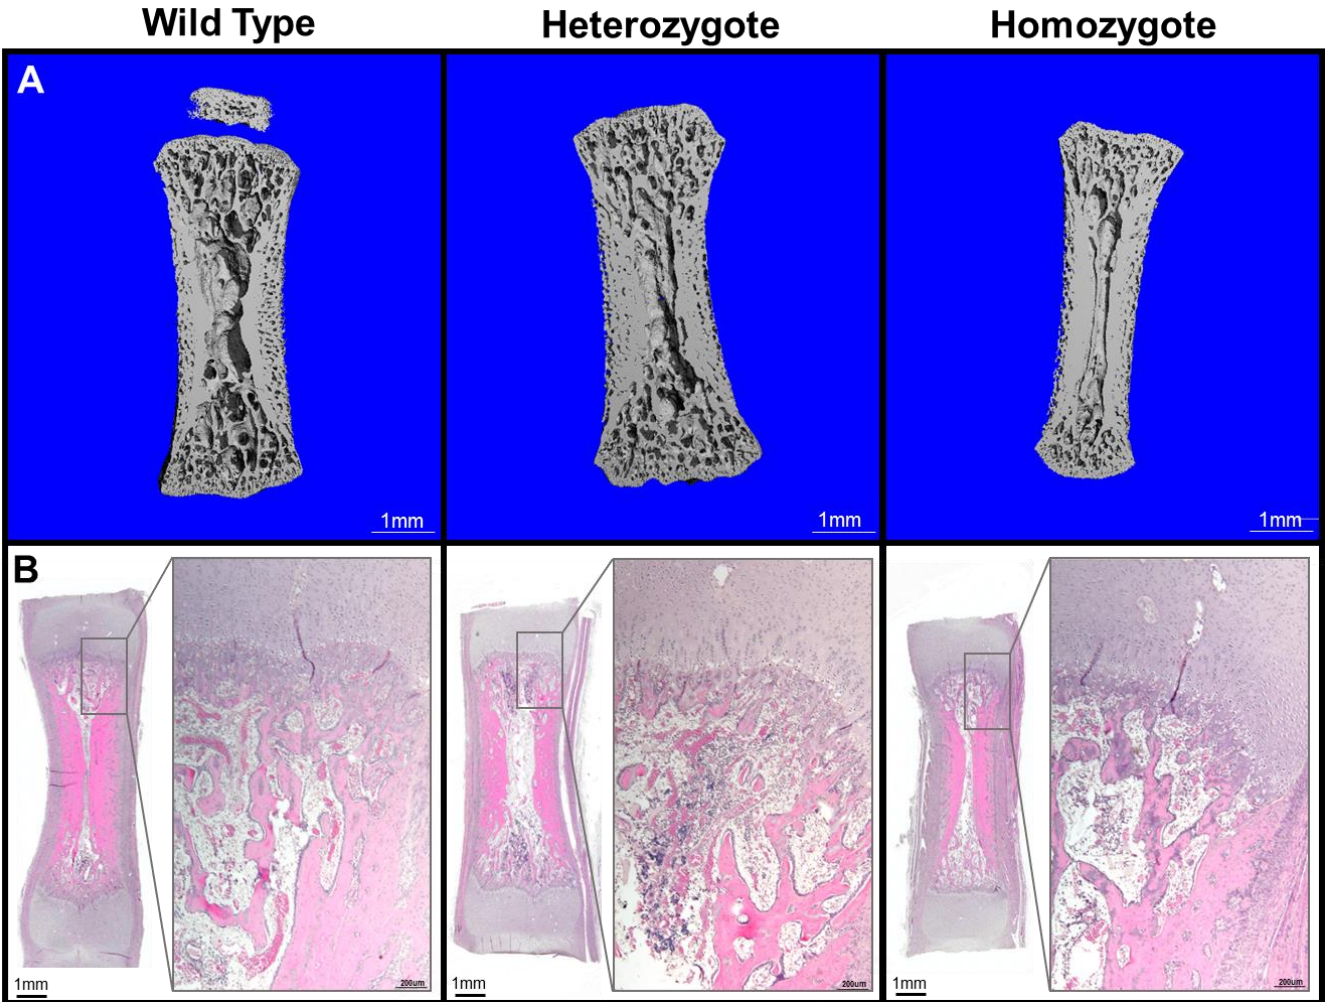

**Supplemental Fig. 3 MicroCT reconstructions and histology of *ALPL* c.1077C>G targeted sheep vertebrae (A).** 3D renderings of individual caudal vertebrae from wild type, heterozygous and homozygote lambs. Images are sagittally cut to show the extent of mid-shaft cortical and trabecular bone in each vertebral body. **(B)** H&E stained histologic sections from the same wild type, heterozygous and homozygote vertebrae shows a similar sagittal cross-sectional view of the vertebrae representative of each genotype. Insets show developing bone formation, teams of osteoblasts lining trabecular spicules and osteons in the developing sheep cortical bone.

**Supplemental Table 1.** Minimal potential off-target sites using the ALPL c1077C>G guide #1 sequence.

| Sequence             | PAM | Score (%)   | Gene                | Chromosome | Strand | Position  | bp Mismatch |
|----------------------|-----|-------------|---------------------|------------|--------|-----------|-------------|
| GATGGACCAGGCCATCGGGC | AGG | 100         | ENSOARG00000008507  | chr2       | -1     | 244078281 | 0           |
| GCTGGACCAGGCCATCGGGG | AGG | 8.611956522 |                     | chr11      | -1     | 33997742  | 2           |
| GAAGAAGCAAGCCATCGGGC | AAG | 0.924515551 |                     | chr1       | -1     | 246604745 | 4           |
| CAGGGACCAGGCCATCGGGT | CGG | 0.859266382 |                     | chr24      | -1     | 41705814  | 4           |
| CTGGGACCAGGACATCGGGC | AGG | 0.796410829 |                     | chr11      | 1      | 13803103  | 4           |
| CTGGGACCAGGACATCGGGC | AGG | 0.796410829 |                     | chr11      | 1      | 13798153  | 4           |
| GTTGGCGGAGGCCATCGGGC | TGG | 0.595983173 | ENSOARG00000001576  | chr26      | -1     | 32197030  | 4           |
| TAGGGACCCGGCCATCGGGG | CGG | 0.56287496  |                     | chr3       | -1     | 219963922 | 4           |
| GCTGGGCGAGCCATCGGGC  | AGG | 0.526959664 |                     | JH924580.1 | 1      | 31944     | 4           |
| GCTGGGCCCCGCCATCGGGC | CAG | 0.525048121 | ENSOARG000000018751 | chr24      | -1     | 24785660  | 4           |
| GCTGAGCCAGGCCATCGGGC | AAG | 0.522357396 |                     | chr11      | -1     | 18680004  | 4           |

ENSOARG00000008507= *ALPL* gene
